# Supplementary material
Source: Research Square preprint supplement (doi:10.21203/rs.3.rs-9034119/v1)
Supplement: Supplementary file 1 [file 3abd8a72b2178310405fee88.docx]

**HIGHLIGHTS**

• Urban campus functions as a micro-refuge for stingless bees;

• Myrtaceae predominates in the pollen spectrum during dearth;

• Morning-concentrated foraging reflects microclimatic adjustment;

• Corbicular palynology reveals instantaneous trophic niche;

• Selective yet flexible resource use in anthropized landscape.
